# Supplementary material for: Development and validation of the short version of the Psychological General Well-Being Index (PGWB-S)
Source: Health Qual Life Outcomes. 2006 Nov 14;4:88. doi: 10.1186/1477-7525-4-88 (PMC1647268; doi:10.1186/1477-7525-4-88)
Supplement: Additional File 1 — Psychological General Well Being Index. [file 1477-7525-4-88-S1.doc]

# **Additional file Psycological General Well Being Index**

**1. How have you been feeling in general during the past month?**

In excellent spirits………………………………………………………………… 5

In very good spirits……………………………………………………………….. 4

In good spirits mostly…………………………………………………………….. 3

I have been up and down in spirits a lot………………………………………….. 2

In low spirits mostly……………………………………………………………… 1

In very low spirits………………………………………………………………… 0

**2. How often were you bothered by any illness, bodily disorder, aches or pains**

**during the past month?**

Every day………………………………………………………………………… 0

Almost every day………………………………………………………………… 1

About half of the time……………………………………………………………. 2

Now and then, but less than half the time………………………………………... 3

Rarely…………………………………………………………………………….. 4

None of the time………………………………………………………………….. 5

**3. Did you feel depressed during the past month?**

Yes – to the point that I felt like taking my life………………………………….. 0

Yes – to the point that I did not care about anything…………………………….. 1

Yes – very depressed almost every day………………………………………….. 2

Yes – quite depressed several times……………………………………….……... 3

Yes – a little depressed now and then……………………………………………. 4

No – never felt depressed at all…………………………………………………… 5

**4. Have you been in firm control of your behaviour, thoughts, emotions**

**or feelings during the past month?**

Yes, definitely so………………………………………………………………… 5

Yes, for the most part……………………………………………………………. 4

Generally so……………………………………………………………………… 3

Not too well……………………………………….……………………………... 2

No, and I am somewhat disturbed……………………………………………….. 1

No, and I am very disturbed……………………………………………………… 0

**5. Have you been bothered by nervousness or your “nerves” during**

**the past month?**

Extremely so – to the point where I could not work or take care of things……… 0

Very much so…………………………………………………………………….. 1

Quite a bit………………………………………………………………………… 2

Some – enough to bother me…………………….………………………………. 3

A little……………………………………………………………………………. 4

Not at all………………………………………………………………………….. 5

**6. How much energy, pep, or vitality did you have or feel during**

**the past month?**

Very full of energy – lots of pep…………………………………………………. 5

Fairly energetic most of the time……………………………………………….… 4

My energy level varied quite a bit………………………………………………... 3

Generally low in energy or pep………………….…………………………….…. 2

Very low in energy or pep most of the time……………………………………… 1

No energy or pep at all – I fell drained, sapped…………………………………... 0

**7. I felt downhearted and blue during the past month.**

None of this time………………………………………………………………… 5

A little of the time……………………………………………….……………….. 4

Some of the time……………………………………………….………………… 3

A good bit of the time………………….…………………………….…………... 2

Most of the time………………………………………………………………….. 1

All of the time………………………………….………………………………… 0

**8. Were you generally tense or did you feel any tension during the past month?**

Yes – extremely tens, most or all of the time……………………………………. 0

Yes – very tense most of the time……………………………………………….. 1

Not generally tense, but did feel fairly tense several times……………………….. 2

I felt a little tense a few times………………….………………………………… 3

My general tension level was quite low…………………………………………. 4

I never felt tense or any tension at all…………………………………………….. 5

**9. How happy, satisfied, or pleased have you been with your personal life**

**during the past month?**

Extremely happy – could not have been more satisfied or pleased……………… 5

Very happy most of the time…………………………………………………….. 4

Generally satisfied, pleased……………………………………………………… 3

Sometimes fairly happy, sometimes fairly unhappy…………………………….. 2

Generally dissatisfied or unhappy…….…………………………………………. 1

Very dissatisfied or unhappy most or all the time……………………………….. 0

**10. Did you feel healthy enough to carry out the things you like to do**

**or had to do during the past month?**

Yes – definitely so………………………………………………..……………… 5

For the most part…………..……………………………………….…………….. 4

Health problems limited me in some important ways…………………………… 3

I was only healthy enough to take care of myself …………………………….. 2

I needed some help in taking care of myself.……………………………………. 1

I needed someone to help me with most or all of the things I had to do..……….. 0

**11. Have you felt so sad, discouraged, hopeless, or had so many problems**

**that you wondered if anything was worthwhile during the past month?**

Extremely so – to the point that I have just about given up..……..……………… 0

Very much so….…………..……………………………………….…………….. 1

Quite a bit………………………………………………………………………… 2

Some – enough to bother me…………………………………………………….. 3

A little bit…………………………………..……….……………………………. 4

Not at all………………………………………………………………....……….. 5

**12.** **I woke up feeling fresh and rested during the past month.**

None of the time…………………………………………....……..……………… 0

A little of the time..………..……………………………………….…………….. 1

Some of the time..………………………………………………………………… 2

A good bit of the time…………………………………………………………….. 3

Most of the time…...………………………..……….……………………………. 4

All of the time…………………………………………………………....……….. 5

**13. Have you been concerned, worried, or had any fears about your health**

**during the past month?**

Extremely so…..…………………………………………....……..……………… 0

Very much so……..………..……………………………………….……………. 1

Quite a bit……....………………………………………………………………… 2

Some, but not a lot….……………………………………………………………. 3

Practically never......………………………..……….……………………………. 4

Not at all………………………………………………………………....……….. 5

**14. Have you had any reason to wonder if you were losing your mind,**

**or losing control over the way you act, talk, think, feel or of your**

**memory during the past month?**

Not at all…..…………………………………………....……..…………………. 5

Only a little……..………..……………………………………….…………….... 4

Some – but not enough to be concerned or worried about………………………. 3

Some and I have been a little concerned………………………………………… 2

Some and I am quite concerned..…………..……….……………………………. 1

Yes, very much so and I am very concerned…………………………....……….. 0

**15. My daily life was full of things that were interesting to me during**

**the past month.**

None of the time……………………………………....……..…………………... 0

A little of the time………..……………………………………….…………….... 1

Some of the time…………………………………………………………………. 2

A good bit of the time………………….………………………………………… 3

Most of the time………………..…………..……….……………………………. 4

All of the time………………………………………………………....…………. 5

**16. Did you feel active, vigorous, or dull, sluggish during the past month?**

Very active, vigorous every day……..………………....……..…………………. 5

Mostly active, vigorous – never really dull, sluggish…………….…………….... 4

Fairly active, vigorous – seldom dull, sluggish………….………………………. 3

Fairly dull, sluggish – seldom active, vigorous..………………………………… 2

Most dull, sluggish – never really active, vigorous...……………………………. 1

Very dull, sluggish every day…………………………………………....………. 0

**17. Have you been anxious, worried, or upset during the past month?**

Extremely so – to the point of being sick or almost sick……..………………….. 0

Very much so…...………..……………………………………….…………….... 1

Quite a bit……...…………………………………………………………………. 2

Some – enough to bother me..………….………………………………………… 3

A little bit……..………………..…………..……….……………………………. 4

Not at all…….………………………………………………………....…………. 5

**18. I was emotionally stable and sure of myself during the past month.**

None of the time……………………………………....……..…………………... 0

A little of the time………..……………………………………….…………….... 1

Some of the time…………………………………………………………………. 2

A good bit of the time………………….………………………………………… 3

Most of the time………………..…………..……….……………………………. 4

All of the time………………………………………………………....…………. 5

**19. Did you feel relaxed, at ease or high strung, tight, or keyed-up**

**during the past month?**

Felt relaxed and at ease the whole month……………………..………………….. 5

Felt relaxed and at ease most of the time………………………….…………….... 4

Generally felt relaxed but at times felt fairly high strung...………………………. 3

Generally felt high strung but at times felt fairly relaxed………………………… 2

Felt high strung, tight, or keyed-up most of the time..……………………………. 1

Felt high strung, tight, or keyed-up the whole month.………………....…………. 0

**20. I felt cheerful, lighthearted during the past month.**

None of the time……………………………………....……..…………………... 0

A little of the time………..……………………………………….…………….... 1

Some of the time…………………………………………………………………. 2

A good bit of the time………………….………………………………………… 3

Most of the time………………..…………..……….……………………………. 4

All of the time………………………………………………………....…………. 5

**21. I felt tired, worn out, used up, or exhausted during the past month.**

None of the time……………………………………....……..…………………... 5

A little of the time………..……………………………………….…………….... 4

Some of the time…………………………………………………………………. 3

A good bit of the time………………….………………………………………… 2

Most of the time………………..…………..……….……………………………. 1

All of the time………………………………………………………....…………. 0

**22. Have you been under or felt you were under any strain, stress, or pressure**

**during the past month?**

Yes – almost more than I could bear or stand………………..………………….. 0

Yes – quite a bit of pressure…………..………………………….…………….... 1

Yes, some – more than usual………………………….....………………………. 2

Yes, some – but about usual……………………………………………………... 3

Yes – a little………………………………………...……………………………. 4

Not at all…………………………………………….………………....…………. 5
